# Supplementary material for: Fabrication of multi-pyridine functionalized carbon nanotubes as versatile coordination nano-linkers
Source: Royal Society of Chemistry journal article supplement (doi:10.1039/c3ra46802j), 2013-12-18
Supplement: c3ra46802j.pdf [file c3ra46802j.pdf]

# Fabrication of Multi-Pyridine Functionalized Carbon Nanotubes as Versatile Coordination Nano-Linkers

Jiang Liu,<sup>a</sup> Meng Chen,<sup>a</sup> Dong-Jin Qian,<sup>\*,a</sup> and Minghua Liu<sup>b</sup>

<sup>a</sup> Department of Chemistry, Fudan University, 220 Handan Road, Shanghai 200433, China

<sup>b</sup> Beijing National Laboratory for Molecular Science, CAS Key Laboratory of Colloid, Interface and  
Chemical Thermodynamics,

Institute of Chemistry, Chinese Academy of Sciences, No. 2 Zhongguancun Beiyijie, Beijing  
100190, China

## Synthesis of multi-pyridine functionalized carbon nanotubes

A typical experiment on the surface functionalization of MWNTs was performed as follows:  $\text{H}_2\text{N}-\text{C}_6\text{H}_4-\text{CH}_2-\text{Br}$  was produced in a 50 mL flask from commercially available 4-(hydroxymethyl) aniline (0.5 g, 4.1 mmol) and tetrabutylammonium bromide (1.63 g) by heating at 150°C for 24 h in 48% HBr (15 mL). After the mixture was cooled to 0°C, a cooled aqueous  $\text{NaNO}_2$  (0.31 g, 4.5 mmol) solution (3.0 mL) was slowly added to form the diazonium salt  $^+\text{N}_2-\text{C}_6\text{H}_4-\text{CH}_2-\text{Br}$ . The resulting yellow solution was stirred at 0°C for 30 min; a cooled MWNT (15 mg) dispersed solution in 15 mL N,N-dimethylformamide was then added. This reaction system was stirred at 0°C for another 4 h, followed by stirring at room temperature overnight. Finally, the benzyl bromide-functionalized product MWNT-BenBr was obtained by centrifugation and washed well with copious amounts of 48% HBr and dimethylformamide.

The pyridine-functionalized MWNTs-Py hybrid materials were formed by reacting the as-prepared MWNT-BenBr with pyridine-contained compounds of BPy, DPy, TPyP,  $\text{Fe}(\text{Pyterpy})_2$  and PVP in dimethylformamide or chloroform. The products were collected by centrifugation and well washed by the solvents.

## Pd-Mediated Assembly of Layered Ultrathin Films

The multilayer of Pd/MWNT-TPyP was assembled on a quartz substrate surface using the layer-by-layer (LBL) method. The assembly process was shown in Scheme S1, which included the following main steps.<sup>26</sup> Firstly, the hydrophilic quartz substrate was immersed in a methanol solution

of 0.2 mg/mL (*p*-chloromethylphenyl)trichlorosilane over night to form a layer of  $\text{O}_3\text{SiC}_6\text{H}_4\text{CH}_2\text{Cl}$ , which was then covalently attached to the PVP layer (Scheme S1, **A**) by refluxing the substrate in a 0.2 mg/mL PVP methanol solution. Secondly, the PVP-modified quartz substrate was dipped into a 0.1 mmol/L  $\text{Na}_2\text{PdCl}_4$  aqueous solution to form the PVP-Pd layer (**B**). Thirdly, substrate **B** was immersed into a methanol solution of MWNT-TPyP (**C**). Finally, the above processes (**B** and **C**) were repeated. All of the assembly experiments were performed at room temperature.

### Synthesis of Terpyridine-Functionalized Carbon Nanotubes and Their Metal-Complexes

Terpyridine-functionalized hybrids (Figure 2A) were prepared by stirring chloroform solution of MWNT-Py with excess 4-(2,2':6'2''-terpyridin-4'-yl)benzyl bromide at 60°C overnight. The products of MWNT-TPy hybrids were collected by centrifugation and well washed by the solvents. The MWNT-TPy-metal ( $\text{M} = \text{Fe}^{2+}$ ,  $\text{Eu}^{3+}$  and  $\text{Tb}^{3+}$ ) complexes were prepared by stirring methanol solutions of MWNT-TPy with excess  $\text{Fe}(\text{BF}_4)_2$ ,  $\text{Eu}(\text{NO}_3)_3$  or  $\text{Tb}(\text{NO}_3)_3$  at room temperature overnight. The MWNT-MTPy complexes were collected by centrifugation and well washed by water.

### Preparation of Zinc Porphyrin-Functionalized MWNT-Py Composites

Zinc porphyrin functionalized MWNT-Py composite was obtained via an axial coordination of the central Zn(II) ion of zinc tetra(pyridylporphyrin) chloride tetrakis(methochloride) ( $\text{ZnTMPyP}$ ) with the pyridyl substituent of the MWNT-Py hybrids (Figure 2B), which was done by stirring a mixture of  $\text{ZnTMPyP}$  and MWNT-Py hybrids in a methanol solution for 24 h.<sup>27</sup> The solid powders were then collected by centrifugation, well washed by methanol and water to remove unreacted  $\text{ZnTMPyP}$ , and finally dried under vacuum at room temperature.

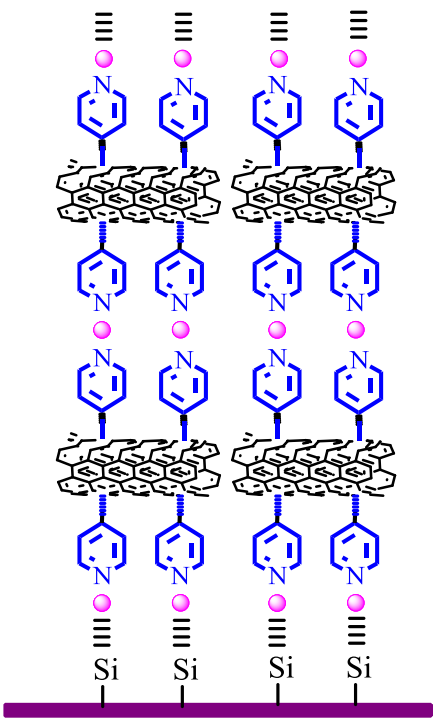

**Scheme S1.** Schematic representation of the Pd(II)/MWNT-TPyP LBL multilayers.

**Table S1.** Binding Energy (eV) for the detected elements of the LBL multilayers

|                         | C (1s) | N (1s) | O (1s) | Cl (2p) | Pd (3d)      | Br (3d) |
|-------------------------|--------|--------|--------|---------|--------------|---------|
| Qz/BPy                  | 284.8  | 400.0  | 532.6  | 198.1   |              |         |
| Qz/BPy/Pd               | 284.8  | 400.1  | 532.2  | 198.2   | 337.4, 343.0 |         |
| Qz/BPy/Pd/<br>CNTs-TPyP | 284.8  | 400.2  | 532.6  | 198.6   | 338.0, 343.2 | 69.2    |

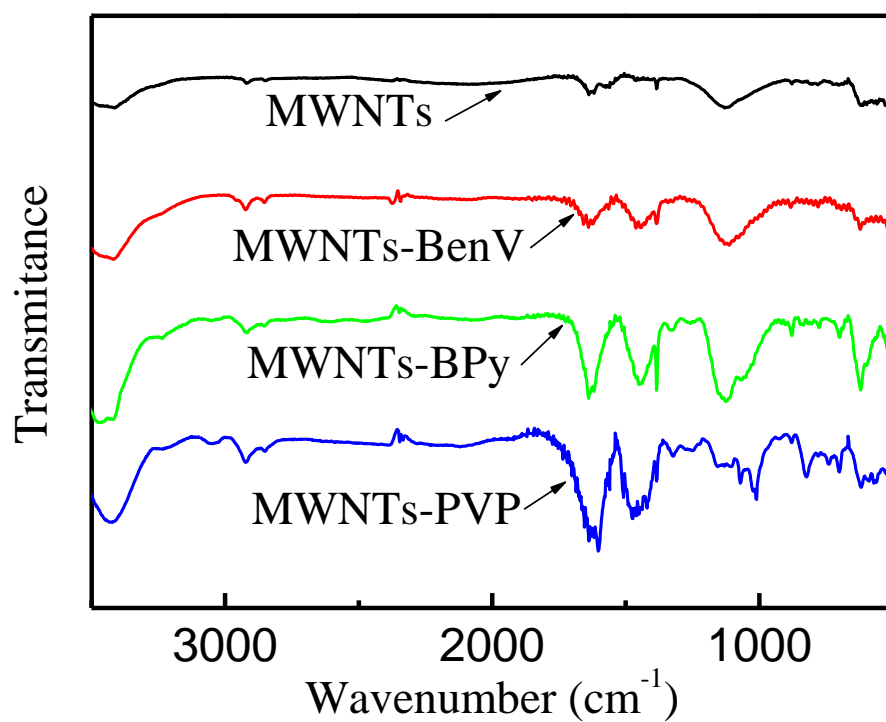

**Figure S1.** FTIR spectra of multi-pyridine functionalized MWNTs together with that of the commercial MWNTs.

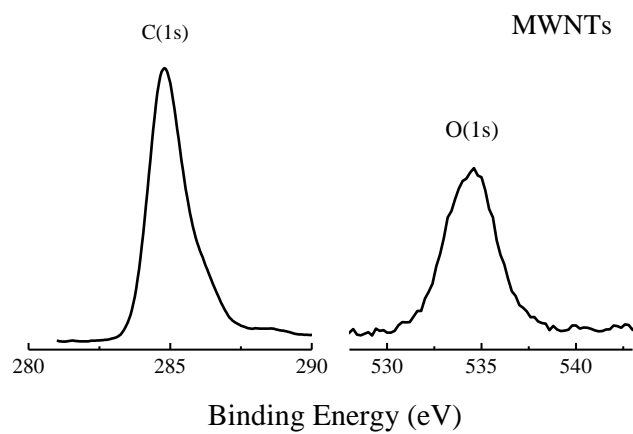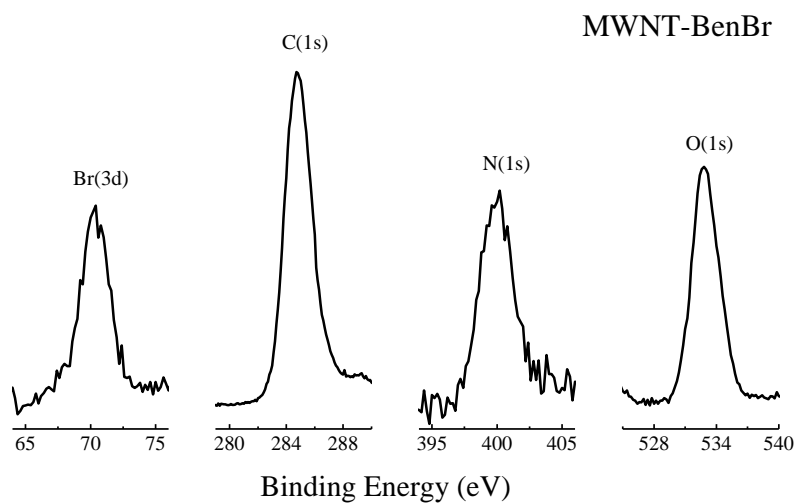

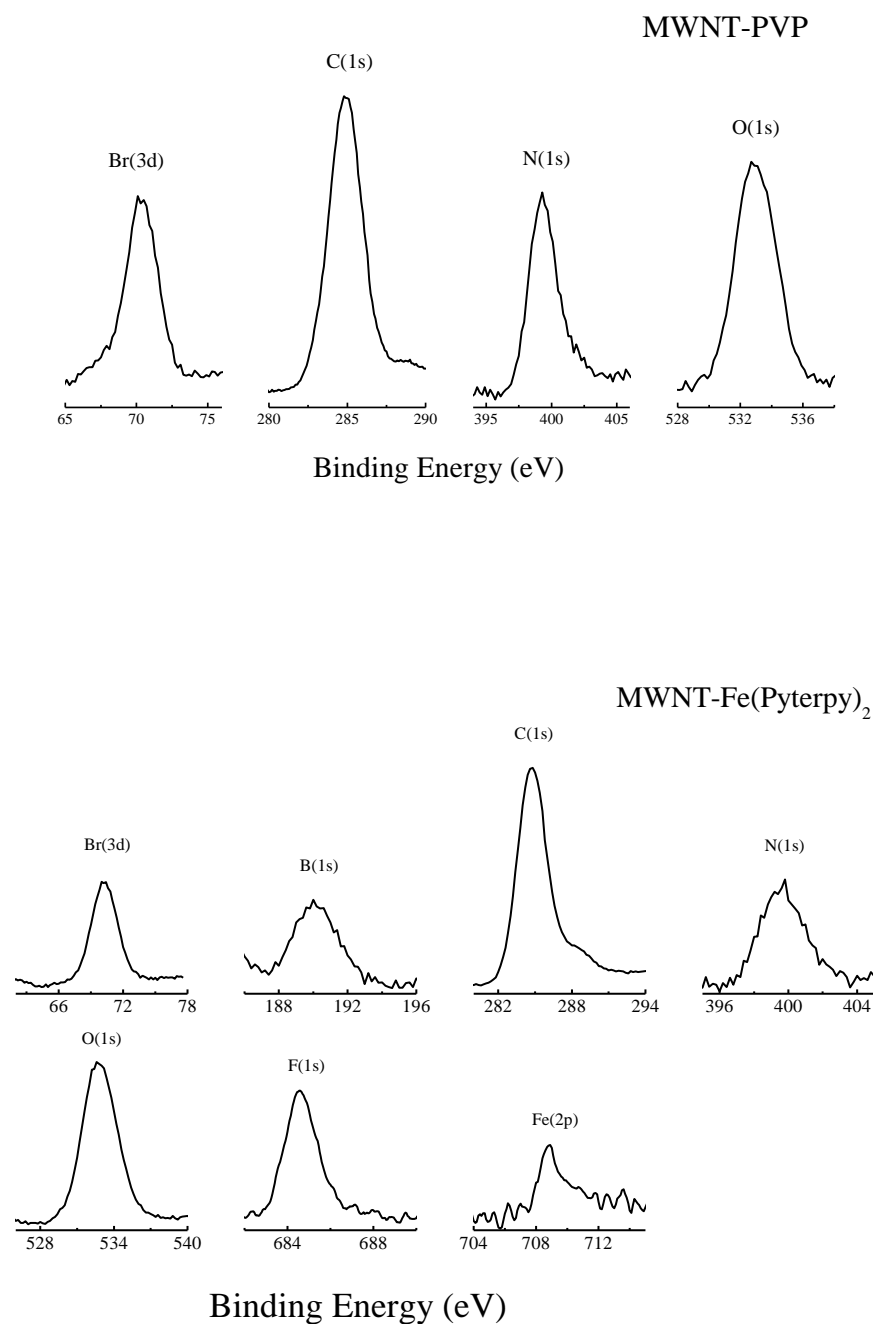

**Figure S2.** High resolution XPS spectra of commercial MWNTs as well as BenBr, PVP and Fe(Pyterpy)<sub>2</sub> functionalized MWNT hybrids.

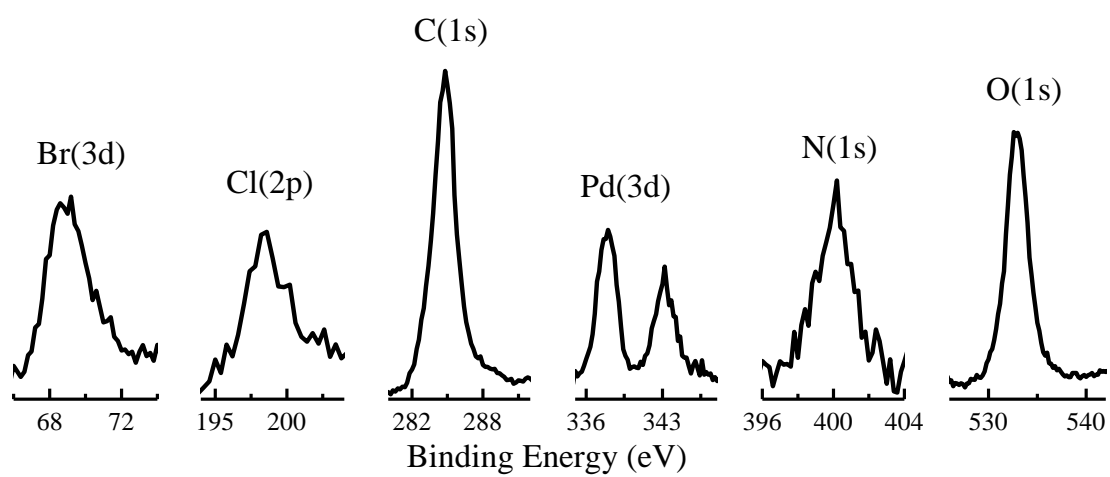

**Figure S3.** High resolution XPS spectra of Pd/MWNTs-TPyP LBL multilayers on quartz substrate surface.

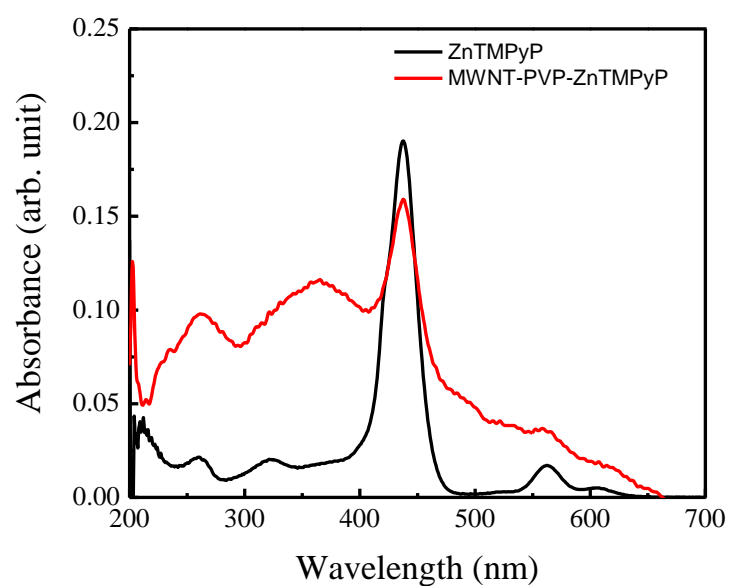

**Figure S4.** UV-vis absorption spectra of ZnTMPyP and its axial coordination nanocomposites with pyridine-functionalized nanotubes (MWNT-PVP-ZnTMPyP) in the methanol solutions.

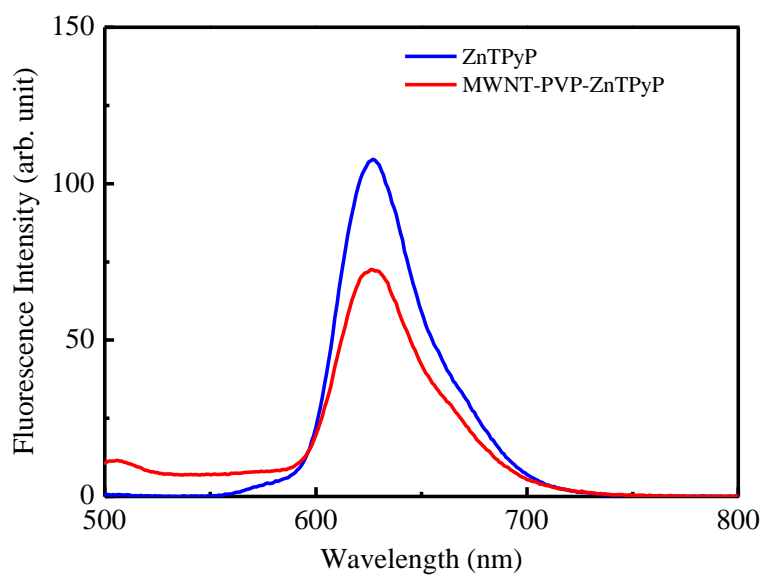

**Figure S5.** Fluorescence emission spectra of ZnTMPyP and its axial coordination nanocomposites with pyridine-functionalized nanotubes (MWNT-PVP-ZnTMPyP) in the methanol solutions.

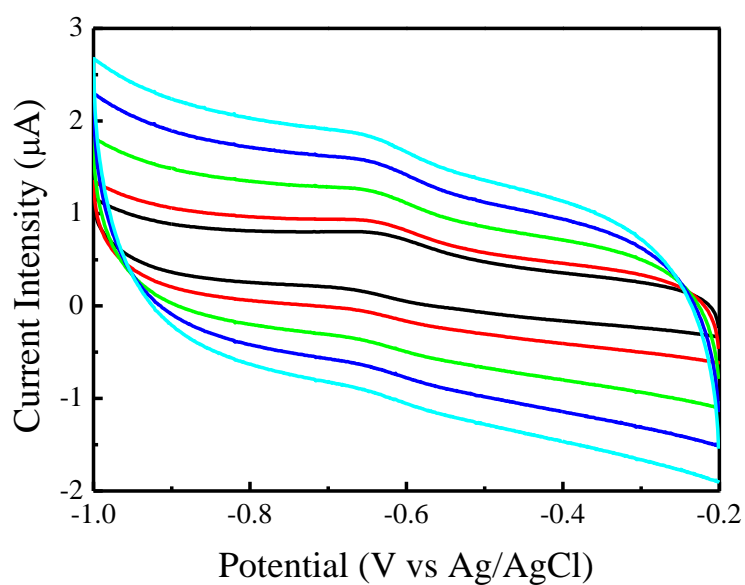

**Figure S6.** Cyclic voltammograms for the glass carbon electrode covered by the casting film of MWNTs-Fe(Pyterpy)<sub>2</sub> hybrids in the 0.05 M KCl electrolyte solution at the potential scan rates of 0.05, 0.1, 0.2, 0.3 and 0.4 V/s.
